# Supplementary material
Source: PubMed Central journal article supplement (PMC1890421)
Supplement: tjp0576-0727-fs1.pdf [file tjp0576-0727-fs1.pdf]

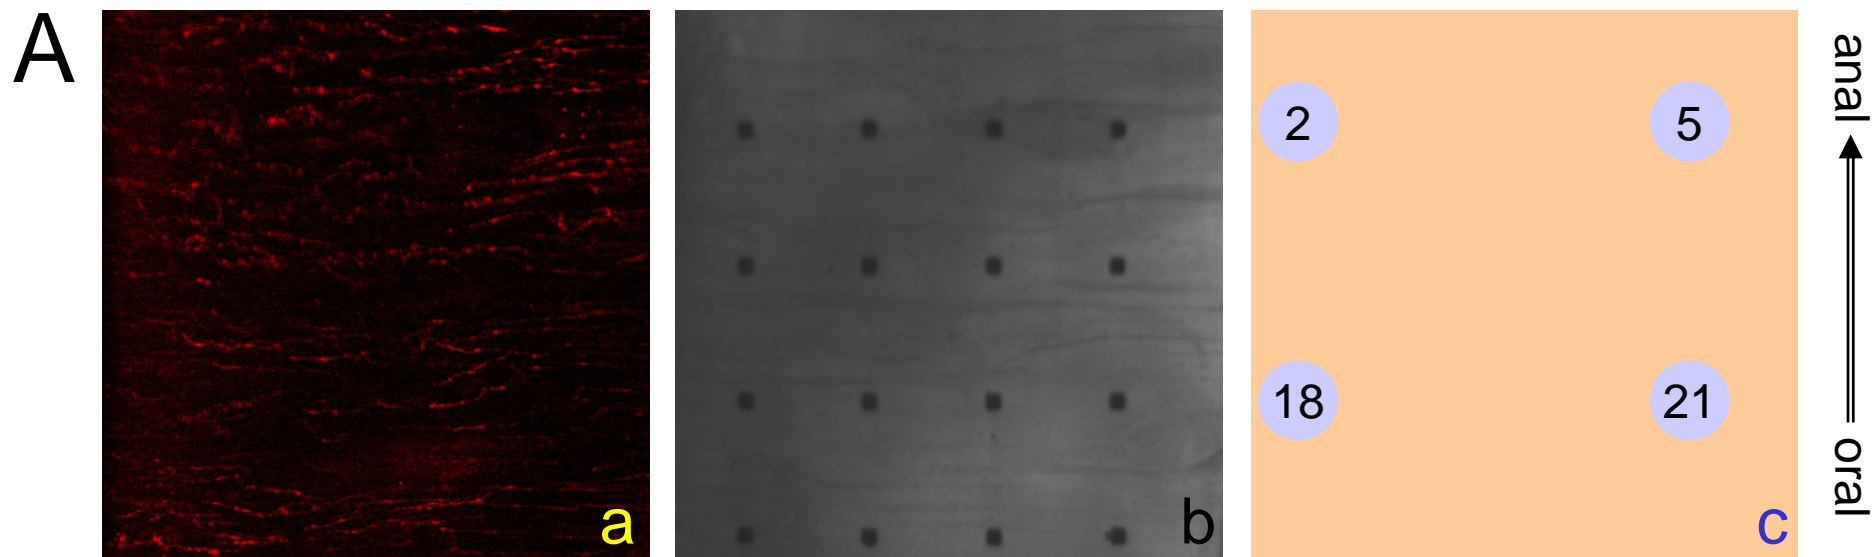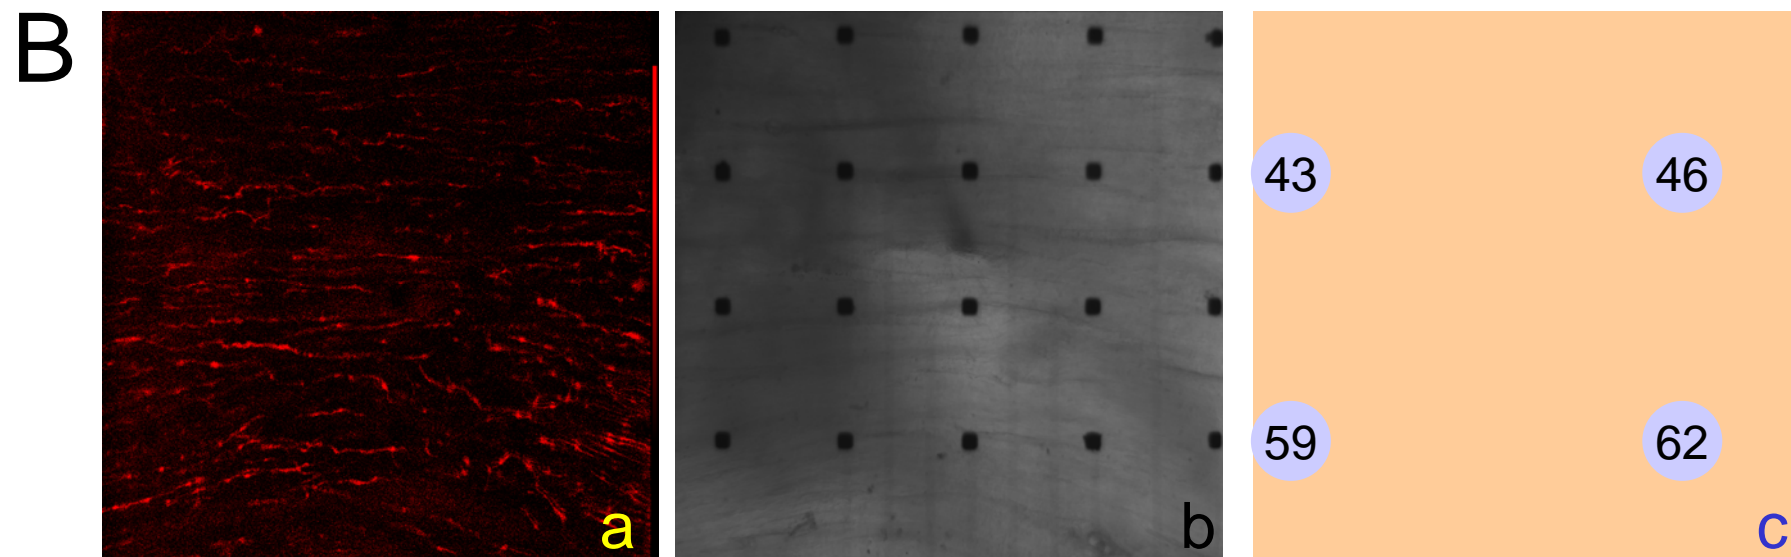

c-Kit immunostaining

Transmission image

Channel #

Supplemental Figure 1. Histological examinations in two recording regions A and B in the same preparation used in Figure 3. Transmission (a) and immunostaining images (b) were obtained using a confocal microscope. In (b) phycoerythrin (PE)-conjugated anti-c-Kit antibody (ACK2) was applied to demonstrate c-Kit-immunopositive cells running along the circular muscle. The number of electrode is indicated in (c).
