# Supplementary material
Source: PubMed Central journal article supplement (PMC1890421)
Supplement: tjp0576-0727-fs2.pdf [file tjp0576-0727-fs2.pdf]

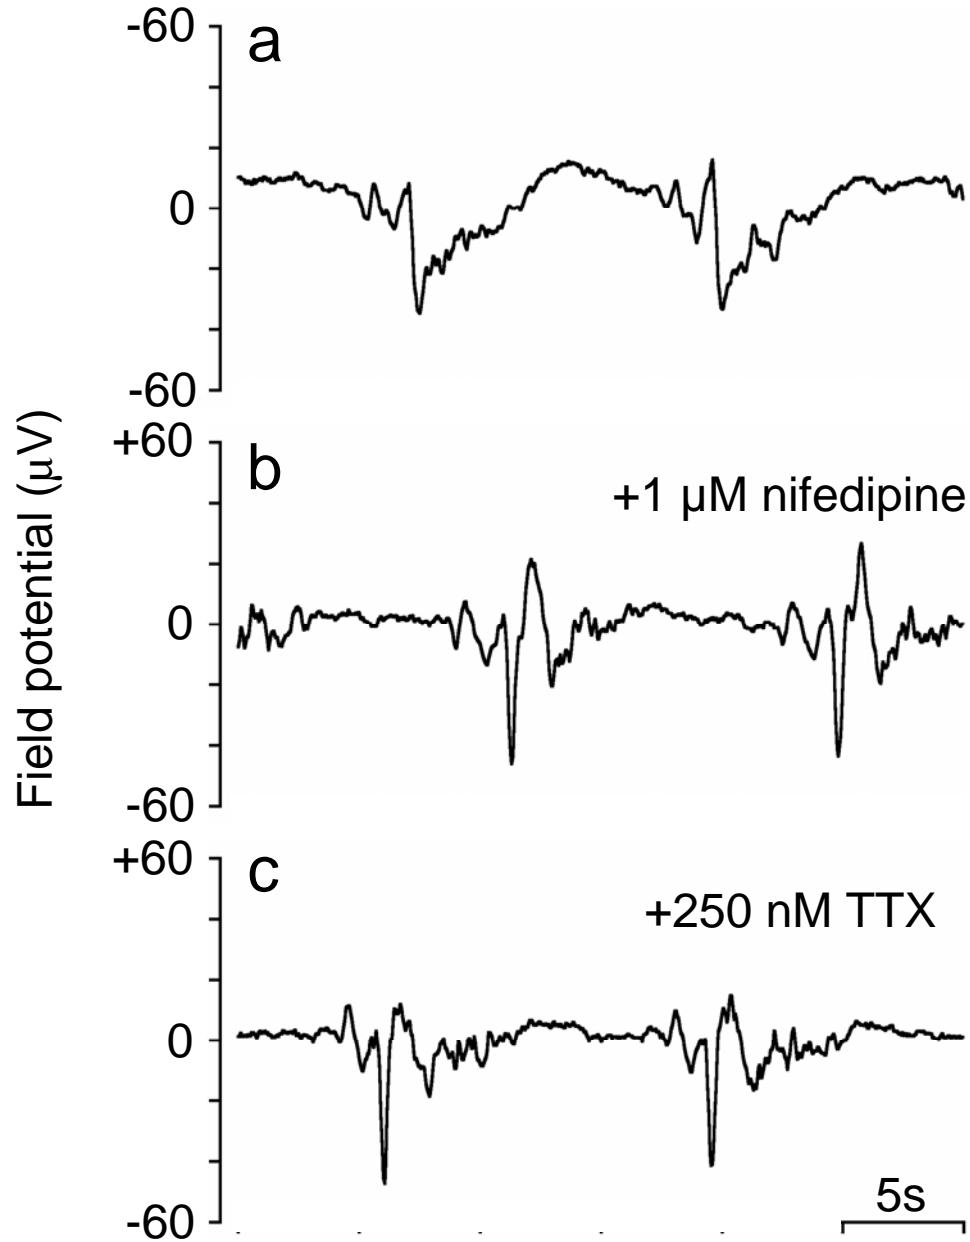

Supplemental Figure 2. The field potentials recorded at Ch14 in the same stomach muscle preparation used in Fig. 3, are shown expanded. The trace (a) was recorded in normal solution. The traces in (b) and (c) were obtained in the presence of 1  $\mu\text{M}$  nifedipine, and additional presence of 250 nM TTX. The shape of the slow component was changed after the application of nifedipine in a limited region of this preparation. No significant change in the noise level.
