# Supplementary material
Source: PubMed Central journal article supplement (PMC1890421)
Supplement: tjp0576-0727-fs3.pdf [file tjp0576-0727-fs3.pdf]

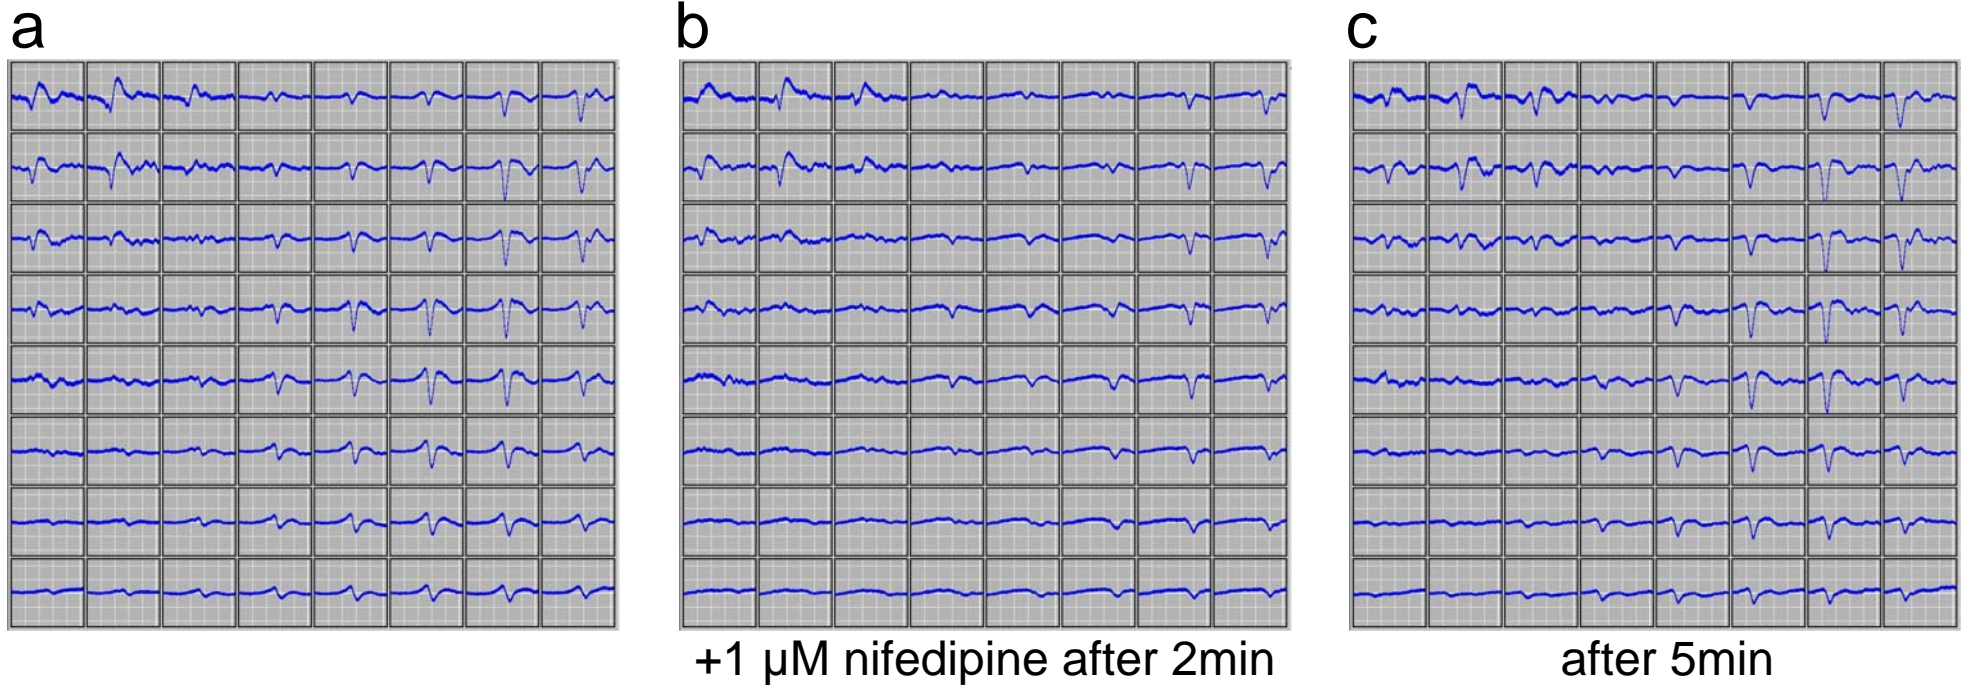

Supplemental Figure 3. An example of spontaneous electrical activity recorded using an array of 8 x 8 microelectrodes. The set of field potentials in (a) were recorded in normal solution, while those in (b) and (c) were recorded in the presence of nifedipine (1  $\mu\text{M}$ ). After application of nifedipine for 2 min, only a small change in the slowly decaying component (e.g. Ch. 2) was observed with little change in the noise level. The propagation velocity and direction of spontaneous electrical activity clearly changed during application of nifedipine.
